# Supplementary material for: Sinularin, an Anti-Cancer Agent Causing Mitochondria-Modulated Apoptosis and Cytoskeleton Disruption in Human Hepatocellular Carcinoma
Source: MDPI journal article supplement (doi:10.3390/ijms22083946), 2021-04-11
Supplement: s1 [file s1]

# **Sinularin, an anti-cancer agent causing mitochondria-modulated apoptosis and cytoskeleton disruption in human hepatocellular carcinoma**

**Chou-Yuan Ko** <sup>1,2†</sup>, **Po-Chang Shih** <sup>3,4†</sup>, **Po-Wei Huang** <sup>3</sup>, **Yi-Hsin Lee** <sup>3</sup>, **Yen-Fu Chen** <sup>1</sup>,  
**Ming-Hong Tai** <sup>5,6</sup>, **Chi-Hao Liu** <sup>7</sup>, **Zhi-Hong Wen** <sup>3,\*</sup>, **Hsiao-Mei Kuo** <sup>3,6,\*</sup>

<sup>1</sup>Division of Gastroenterology and Hepatology, Department of Internal Medicine, Kaohsiung Armed Forces General Hospital, Kaohsiung, 80284, Taiwan; gastroenterokjy@gmail.com (C.-Y.K.); lineageofray@hotmail.com (Y.-F.C.)

<sup>2</sup>Institute of Medical Science and Technology, National Sun Yat-Sen University, Kaohsiung, 80424, Taiwan

<sup>3</sup>Department of Marine Biotechnology and Resources, National Sun Yat-sen University, Kaohsiung, 80424, Taiwan; smoke88722@gmail.com (P.-W.H.); po-chang.shih.14@ucl.ac.uk (P.-C.S.); lesinsin@gmail.com (Y.-H.L.); Hsiaomeikuo@gmail.com (H.-M.K.)

<sup>4</sup>UCL School of Pharmacy, University College London, Bloomsbury, London WC1N 1AX, UK

<sup>5</sup>Institute of Biomedical Sciences, National Sun Yat-sen University, Kaohsiung 80424, Taiwan; minghongtai@gmail.com (M.-H.T.)

<sup>6</sup>Center for Neuroscience, National Sun Yat-sen University, Kaohsiung 80424, Taiwan; minghong-tai@gmail.com

<sup>7</sup>Division of Nephrology, Department of Internal Medicine, Kaohsiung Armed Forces General Hospital, Kaohsiung 80284, Taiwan; colinliu1201@gmail.com

\*Correspondence: wzh@mail.nsysu.edu.tw (Z.-H.W.); Hsiaomeikuo@gmail.com (H.-M.K.);

Tel.: +886-7-5252000 (ext. 5038) (Z.-H.W. & H.-M.K.); Fax: +886-7-5252021 (Z.-H.W. & H.-M.K.)

<sup>†</sup>These authors contributed equally to this work.

## 1. Supplementary Table

**Supplementary Table S1.** Information on primary and secondary antibodies used in the western blot analysis of this study.

| Primary Antibody                        | Catalogue | Secondary antibody | Provider       | Dilution |
|-----------------------------------------|-----------|--------------------|----------------|----------|
| Caspase-9                               | 9502      | Mouse              | Cell Signaling | 1:1000   |
| Pro-caspase-3                           | 9662      | Rabbit             | Cell Signaling | 1:500    |
| Cleaved-caspase-3                       | 9664      | Rabbit             | Cell Signaling | 1:500    |
| Cu/Zn SOD                               | ab13498   | Rabbit             | Abcam          | 1:500    |
| Mn SOD                                  | sc-133134 | Mouse              | Santa Cruz     | 1:1000   |
| Bcl-2                                   | 15071     | Mouse              | Cell Signaling | 1:1000   |
| Bax                                     | 2772S     | Rabbit             | Cell Signaling | 1:1000   |
| Total OXPHOS Human WB Antibody Cocktail | ab110411  | Mouse              | Abcam          | 1:1000   |
| p-AKT                                   | 9271s     | Rabbit             | Cell Signaling | 1:1000   |
| AKT                                     | 9272S     | Rabbit             | Cell Signaling | 1:1000   |
| p-ERK1/2                                | 9101S     | Rabbit             | Cell Signaling | 1:1000   |
| ERK1/2                                  | 9102S     | Rabbit             | Cell Signaling | 1:1000   |
| p-p38 MAPK                              | 45115     | Rabbit             | Cell Signaling | 1:1000   |
| p38 MAPK                                | 9212      | Rabbit             | Cell Signaling | 1:1000   |
| p-JNK                                   | 4668s     | Rabbit             | Cell Signaling | 1:1000   |
| JNK                                     | 9252s     | Rabbit             | Cell Signaling | 1:1000   |
| E-cadherin                              | ab53033   | Rabbit             | Abcam          | 1:1000   |
| vimentin                                | ab45939   | Rabbit             | Abcam          | 1:1000   |
| VEGF                                    | 05-443    | Mouse              | Millipore      | 1:1500   |
| $\beta$ -actin                          | A5441     | Mouse              | Sigma-Aldrich  | 1:5000   |

## 2. Supplementary Figures

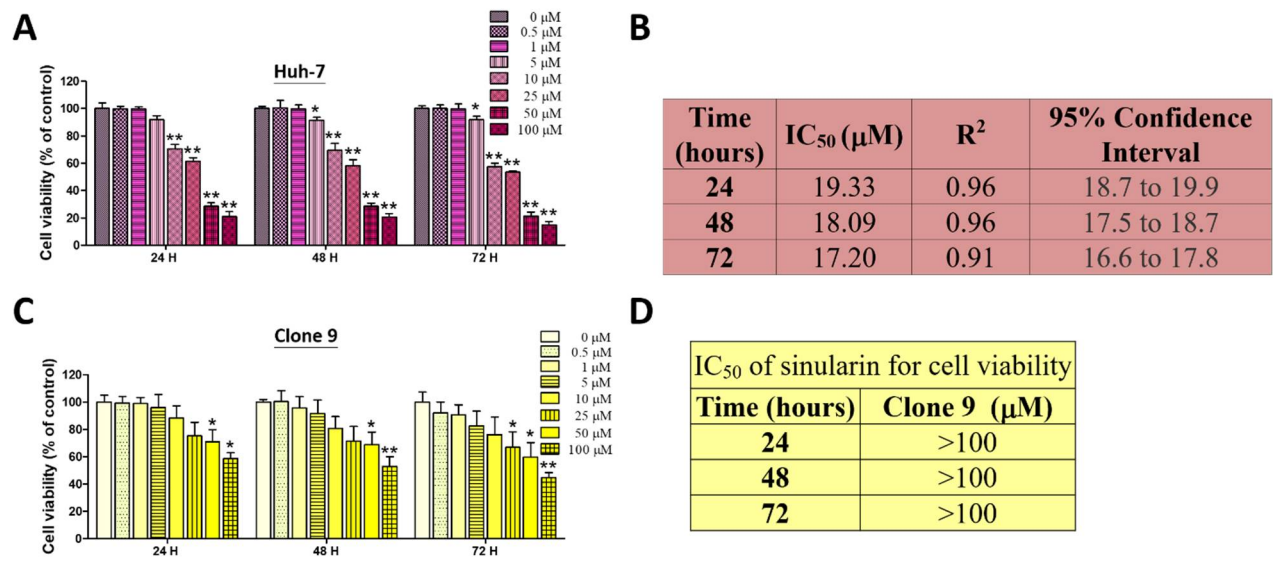

**Supplementary Figure S1.** The effects of sinularin on cell viability in Huh-7 and Clone 9 cells: **(A)** Quantification of Huh-7 cell viability using the MTT assay with sinularin at concentrations of 0, 0.5, 1, 5, 10, 20, 50 or 100 μM after 24, 48 and 72 h, with results expressed as the percentage of viable cells compared to untreated cells (0 μM); **(B)** Determination of IC<sub>50</sub>, R<sup>2</sup>, and 95% confidence interval values for sinularin in Huh-7 cells after 24, 48 and 72 h; **(C)** Quantification of Clone 9 cell viability using the MTT assay with sinularin at concentrations of 0, 0.5, 1, 5, 10, 20, 50 or 100 μM after 24, 48 and 72 h, with results expressed as the percentage of viable cells compared to untreated cells (0 μM); **(D)** Determination of IC<sub>50</sub> for sinularin in Clone 9 cells after 24, 48 and 72 h. \*  $p < 0.05$  and \*\*  $p < 0.01$  relative to the control (sinularin-untreated cells).

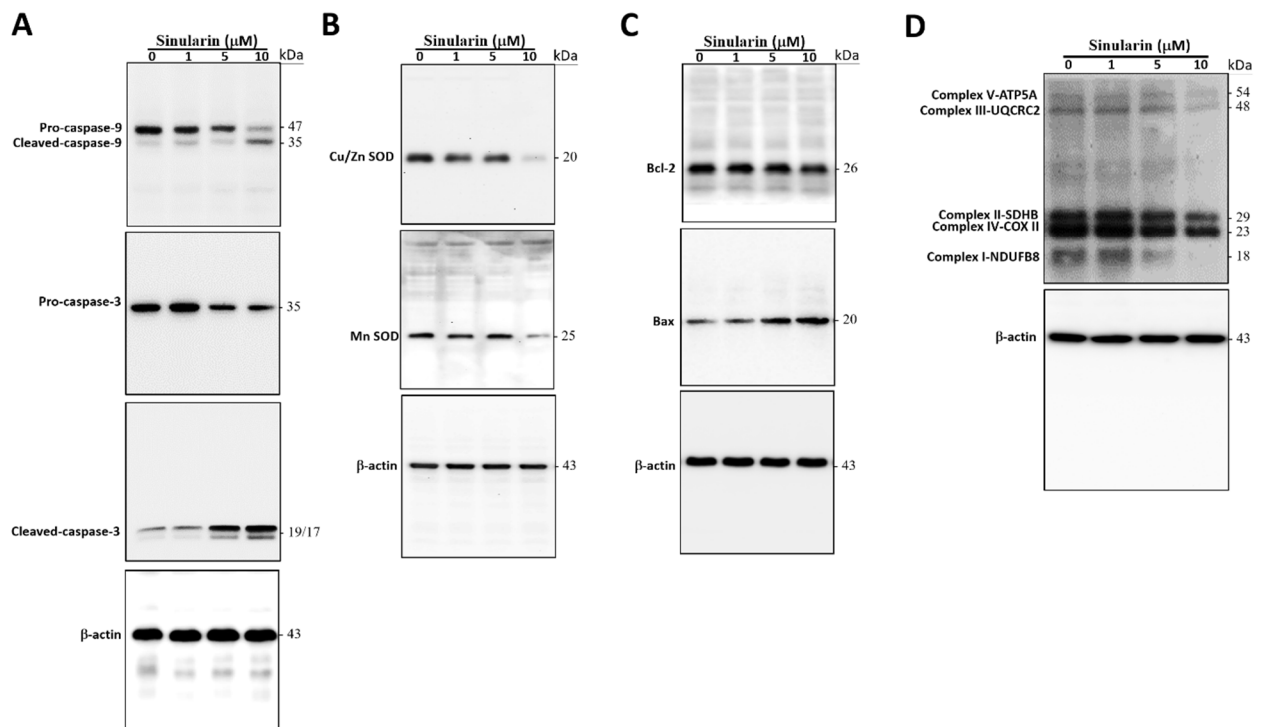

**Supplementary Figure S2.** Original, uncropped images of the western blots for Fig. 1H, 2E, 2K and 3G displayed in the text and results: **(A)** The bands of the cleaved caspase-9, pro-caspase-9, cleaved caspase-3, pro-caspase-3 and  $\beta$ -actin and their expected molecular weight, with  $\beta$ -actin used as the protein loading control; **(B)** The bands of Cu/Zn SOD, Mn SOD and  $\beta$ -actin and their expected molecular weight, with  $\beta$ -actin used as the protein loading control; **(C)** The bands of Bcl-2, Bax, and  $\beta$ -actin bands and their expected molecular weight, with  $\beta$ -actin used as the protein loading control; **(D)** The bands of indicated OXPHOS enzymatic complexes examined using Total OXPHOS Human WB Antibody Cocktail (Abcam, Cambridge, UK), with  $\beta$ -actin used as the protein loading control.

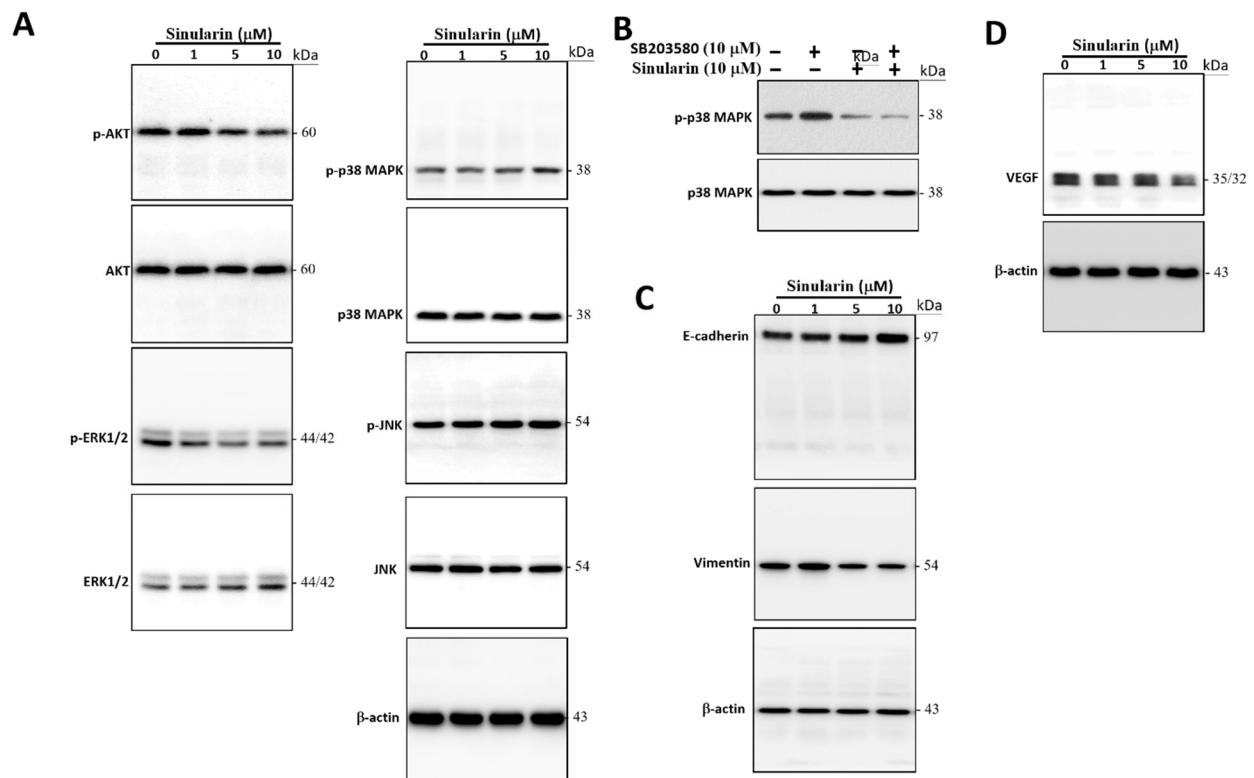

**Supplementary Figure S3.** Original, uncropped images of the western blots for Fig. 6A, 6D, 6F, and 6H displayed in the text and results: **(A)** The bands of p-AKT, AKT, p-ERK1/2, ERK1/2, p-p38 MAPK, p38 MAPK, p-JNK, JNK and  $\beta$ -actin and their expected molecular weight, with  $\beta$ -actin used as the protein loading control; **(B)** The bands of p-p38 MAPK and p38 MAPK and their expected molecular weight; **(C)** The bands of E-cadherin, vimentin and  $\beta$ -actin and their expected molecular weight, with  $\beta$ -actin used as the protein loading control; **(D)** The bands of VEGF and  $\beta$ -actin and their expected molecular weight, with  $\beta$ -actin used as the protein loading control.
